# Supplementary material for: Maize Transformation: From Plant Material to the Release of Genetically Modified and Edited Varieties
Source: Front Plant Sci. 2021 Oct 14;12:766702. doi: 10.3389/fpls.2021.766702 (PMC8553389; doi:10.3389/fpls.2021.766702)
Supplement: Supplementary file 1 [file Table_1.XLSX]

## Sheet: Planilha1
	Table S1. List of Genetically Modified Traits approved and information about Gene and Product, Function, Year of First Approval in the World, and Developer (ISAAA's GM Approval Database. http://www.isaaa.org/gmapprovaldatabase/).
	GM Trait	Gene and Product	Function	First Event Approved	Year of Approval	Developer
	Herbicide tolerance (2,4-D)	aad-1 (aryloxyalkanoate dioxygenase 1 (AAD-1) protein - synthetic form of the aad-1 gene from Sphingobium herbicidovorans)	Detoxifies 2,4-D herbicide by side-chain degradation and degrades the R-enantiomers of aryloxyphenoxypropionate herbicides	DAS40278	2011	Dow AgroSciences LLC
		ft_t (2,4-D and FOPs dioxygenase protein (FT_T)	Provides tolerance to 2,4-D and FOPs herbicides	MON87429	2020	Bayer Australia
	Herbicide tolerance (Glufosinate)	bar (phosphinothricin N-acetyltransferase (PAT) enzyme from Streptomyces hygroscopicus)	Eliminates herbicidal activity of glufosinate (phosphinothricin) herbicides by acetylation	Bt176 (176)	1995	Syngenta
		pat (syn) (phosphinothricin N-acetyltransferase (PAT) enzyme - synthetic form of pat gene derived from Streptomyces viridochromogenes strain Tu 494)	Eliminates herbicidal activity of glufosinate (phosphinothricin) herbicides by acetylation	T14	1995	Bayer CropScience
	Herbicide tolerance (Glyphosate)	2mepsps (5-enolpyruvyl shikimate-3-phosphate synthase enzyme (double mutant version) - Zea mays)	Decreases binding affinity for glyphosate, thereby increasing tolerance to glyphosate herbicide	HCEM485	2012	Stine Seed Farm, Inc
		cp4 epsps (aroA:CP4) (herbicide tolerant form of 5-enolpyruvulshikimate-3-phosphate synthase (EPSPS) enzyme) - A. tumefaciens	Decreases binding affinity for glyphosate, thereby conferring increased tolerance to glyphosate herbicide	NK603	2000	Monsanto Company
		goxv247 (glyphosate oxidase - Ochrobactrum anthropi strain LBAA) and cp4 epsps (aroA:CP4) (herbicide tolerant form of 5-enolpyruvulshikimate-3-phosphate synthase (EPSPS) enzyme - A. tumefaciens)	Confers tolerance to glyphosate herbicides by degrading glyphosate into aminomethylphosphonic acid (AMPA) and glyoxylate	MON832	1996	Monsanto Company
		mepsps (modified 5-enolpyruvylshikimate-3-phosphate synthase (EPSPS) enzyme - Zea mays)	Modified 5-enolpyruvylshikimate-3-phosphate synthase (EPSPS) enzyme	GA21	1998	Monsanto Company
		epsps grg23ace5 (modified 5-enolpyruvylshikimate-3-phosphate synthase (EPSPS) protein or EPSPS ACE5 protein)	Confers tolerance to glyphosate herbicides	VCO-01981-5	2013	Genective S.A.
		gat4621 (glyphosate N-acetyltransferase enzyme from Bacillus licheniformis)	Catalyzes the inactivation of glyphosate, conferring tolerance to glyphosate herbicides	98140	2008	DuPont (Pioneer Hi-Bred International Inc.)
	Sulfonylurea herbicide tolerance	zm-hra (herbicide tolerant acetolactase synthase (als) enzyme from Z. mays)	Confers tolerance to acetolactate synthase-inhibiting herbicides such as sulfonylurea and imidazolinone	98140	2008	DuPont (Pioneer Hi-Bred International Inc.)
	Insect resistance (Lepidopteran)	cry1A.105 (Cry1A.105 protein which comprises the Cry1Ab, Cry1F and Cry1Ac proteins from Bacillus thuringiensis subsp. Kumamotoensis)	Confers resistance to lepidopteran insects by selectively damaging their midgut lining	MON89034	2007	Monsanto Company
		cry1Ab (Cry1Ab delta-endotoxin from Bacillus thuringiensis subsp. Kurstaki)	Confers resistance to lepidopteran insects by selectively damaging their midgut lining	Bt11 (X4334CBR, X4734CBR)	1996	Syngenta
		cry1Ab (truncated) (Cry1Ab delta-endotoxin - synthetic form of Cry1Ab from Bacillus thuringiensis subsp. Kumamotoensis)	Confers resistance to lepidopteran insects by selectively damaging their midgut lining	Bt11 x MIR162	2010	Syngenta
		cry1Ac (Cry1Ac delta-endotoxin from Bacillus thuringiensis subsp. Kurstaki strain HD73)	Confers resistance to lepidopteran insects by selectively damaging their midgut lining	DBT418	1997	Monsanto Company
		cry1F (Cry1Ac delta-endotoxin from Bacillus thuringiensis subsp Kurstaki strain HD73)	Confers resistance to lepidopteran insects by selectively damaging their midgut lining	TC1507 x 59122	2005	Dow AgroSciences LLC and DuPont (Pioneer Hi-Bred International Inc.)
		cry1Fa2 (modified Cry1F protein - synthetic form of cry1F gene derived from Bacillus thuringiensis var. aizawai)	Confers resistance to lepidopteran insects by selectively damaging their midgut lining	TC1507	2001	Dow AgroSciences LLC and DuPont (Pioneer Hi-Bred International Inc.)
		cry2Ab2 (Cry2Ab delta-endotoxin from Bacillus thuringiensis subsp kumamotoensis)	Confers resistance to lepidopteran insects by selectively damaging their midgut lining	MON89034	2007	Monsanto Company
		cry9C (Cry9C delta endotoxin from Bacillus thuringiensis subsp. tolworthi strain BTS02618A)	Confers resistance to lepidopteran insects by selectively damaging their midgut lining	CBH-351	1998	Bayer CropScience
		mocry1F (modified Cry1F protein - ynthetic form of cry1F gene from Bacillus thuringiensis var. aizawai)	Confers resistance to lepidopteran insects by selectively damaging their midgut lining	TC6275	2004	Dow AgroSciences LLC
		pinII (protease inhibitor protein from Solanum tuberosum)	Confers resistance to lepidopteran insects by selectively damaging their midgut lining	DBT418	1997	Monsanto Company
		vip3A(a) (VIP3A vegetative insecticidal protein from Bacillus thuringiensis strain AB88)	Confers resistance to lepidopteran insects by selectively damaging their midgut lining	BT11 x MIR162 x MIR604 x TC1507 x 5307	2019	Syngenta
		vip3Aa20 (vegetative insecticidal protein (vip3Aa variant from Bacillus thuringiensis strain AB88	Confers resistance to lepidopteran insects by selectively damaging their midgut lining	MIR162	2008	Syngenta
	Insect resistance (Coleopteran)	cry34Ab1 (Cry34Ab1 delta-endotoxin from Bacillus thuringiensis strain PS149B1)	Confers resistance to coleopteran insects particularly corn rootworm by selectively damaging their midgut lining	59122	2004	Dow AgroSciences LLC and DuPont (Pioneer Hi-Bred International Inc.)
		cry35Ab1 (Cry35Ab1 delta-endotoxin from Bacillus thuringiensis strain PS149B1)	Confers resistance to coleopteran insects particularly corn rootworm by selectively damaging their midgut lining	59122	2004	Dow AgroSciences LLC and DuPont (Pioneer Hi-Bred International Inc.)
		cry3Bb1 (Cry3Bb1 delta endotoxin - Bacillus thuringiensis subsp. Kumamotoensis)	confers resistance to coleopteran insects particularly corn rootworm by selectively damaging their midgut lining	MON863	2001	Monsanto Company
		mcry3A (modified Cry3A delta-endotoxin - synthetic form of cry3A gene from Bacillus thuringiensis subsp. Tenebrionis	Confers resistance to coleopteran insects particularly corn rootworm pests by selectively damaging their midgut lining	MIR604	2007	Syngenta
		dvsnf7 (double-stranded RNA transcript containing a 240 bp fragment of the WCR Snf7 gene from Western Corn Rootworm - Diabrotica virgifera virgifera)	RNAi interference resulting to down-regulation of the function of the targeted Snf7 gene leading to Western Corn Rootworm mortality.	MON87411	2014	Monsanto Company
	Insect Resistance (Multiple)	ecry3.1Ab (synthetic form of Cry3A gene and Cry1Ab gene from Bacillus thuringiensis - chimeric (Cry3A-Cry1Ab) delta endotoxin protein)	Confers resistance to coleopteran insects by selectively damaging their midgut lining	5307	2012	Syngenta
	Male sterility	barnase (barnase ribonuclease (RNAse) enzyme - Bacillus amyloliquefaciens)	Causes male sterility by interfering with RNA production in the tapetum cells of the anther	MS3	1996	Bayer CropScience
		dam (DNA adenine methylase enzyme from E. coli)	Confers male sterility by interfering with the production of functional anthers and pollen	678	1998	DuPont (Pioneer Hi-Bred International Inc.)
		zm-aa1 (alpha amylase enzyme from Z. mays)	Hydrolyses starch and makes pollen sterile when expressed in immature pollen	32138	2011	DuPont (Pioneer Hi-Bred International Inc.)
		ms45 (ms45 protein - Zea mays)	Restores fertility by restoring the development of the microspore cell wall that gives rise to pollen	32138	2011	DuPont (Pioneer Hi-Bred International Inc.)
	Enhanced Photosynthesis/Yield	zmm28 (transcription factor (ZMM28))	Regulates the expression of genes associated with floral organ development	DP202216	2020	Dow AgroSciences LLC
	Drought stress tolerance	cspB (cold shock protein B - Bacillus subtilis)	Maintains normal cellular functions under water stress conditions by preserving RNA stability and translation	MON87460	2010	Monsanto Company and BASF
	Modified amino acid	cordapA (dihydrodipicolinate synthase enzyme - Corynebacterium glutamicum)	Increases the production of amino acid lysine	LY038	2003	Renessen LLC
	Modified alpha amylase	amy797E (thermostable alpha-amylase enzyme - synthetic gene derived from Thermococcales spp.)	Enhances bioethanol production by increasing the thermostability of amylase used in degrading starch	3272	2006	Syngenta
	Phytase production	phyA2 (phytase enzyme - Aspergillus niger strain 96)	Degrades phytate phosphorus in seeds into inorganic phosphate to be available to animals when used as feed	BVLA430101	2009	Origin Agritech
	Increased Ear Biomass	athb17 (a protein of the class II family of the homeodomain-leucine zipper (HD-Zip) transcription factors - Arabidopsis thaliana)	Modulates plant growth and development and regulates gene expression	MON87403	2015	Monsanto Company
	Mannose metabolism	pmi (Phosphomannose Isomerase (PMI) enzyme from E. coli)	Metabolizes mannose and allows positive selection for recovery of transformed plants	3272	2007	Syngenta
	Visual marker	dsRed2 (red fluorescent protein from Discosoma sp.)	Produces red stain on transformed tissue, which allows visual selection	32138	2011	DuPont (Pioneer Hi-Bred International Inc.)
	* Original/Single Event
